# Supplementary material for: Highly stable lithium ion capacitor enabled by hierarchical polyimide derived carbon microspheres combined with 3D current collectors
Source: Royal Society of Chemistry journal article supplement (doi:10.1039/c7ta05972h), 2017-01-01
Supplement: c7ta05972h1.pdf [file c7ta05972h1.pdf]

## Supporting information

### **Highly stable lithium ion capacitor enabled by hierarchical polyimide derived carbon microspheres combined with 3D current collectors**

*Jiangmin Jiang,<sup>†</sup> Ping Nie,<sup>†</sup> Bing Ding, Yadi Zhang, Guiyin Xu, Langyuan Wu, Hui*

*Dou and Xiaogang Zhang\**

Jiangsu Key Laboratory of Materials and Technology for Energy Conversion, College of Material Science and Engineering, Nanjing University of Aeronautics and Astronautics, Nanjing 210016, China

#### AUTHOR INFORMATION

##### **Corresponding Author**

\*E-mail: azhangxg@163.com

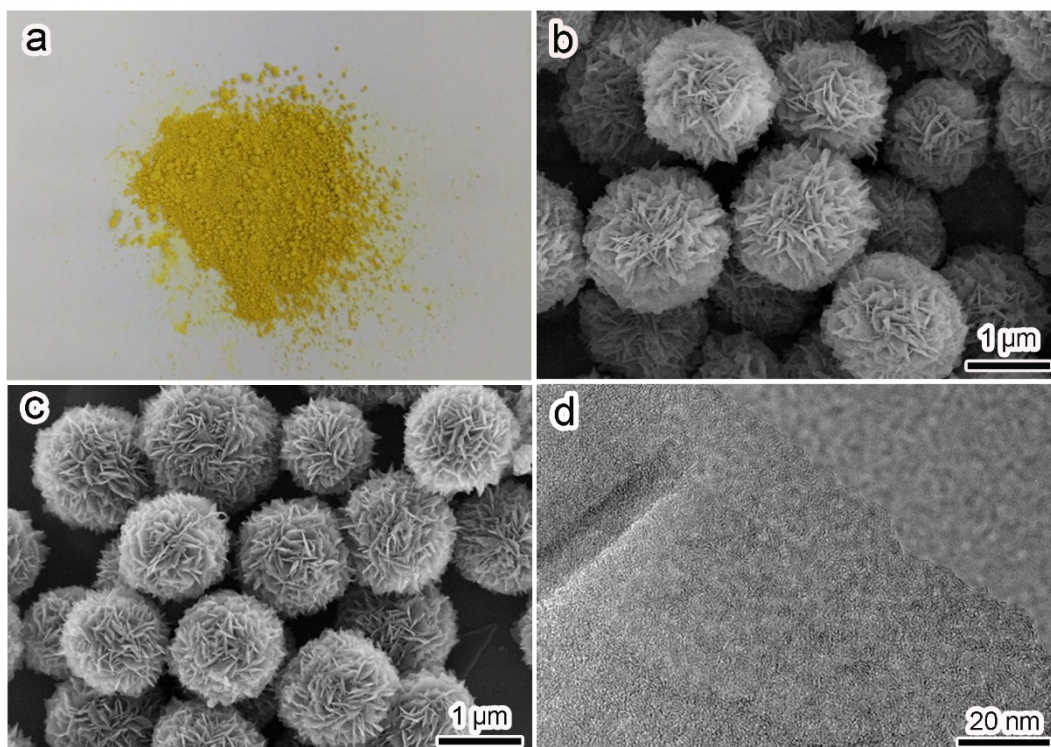

**Figure S1.** (a) The photograph and (b) SEM images of polyimide, (c) SEM image and (d) TEM image of NPCM700.

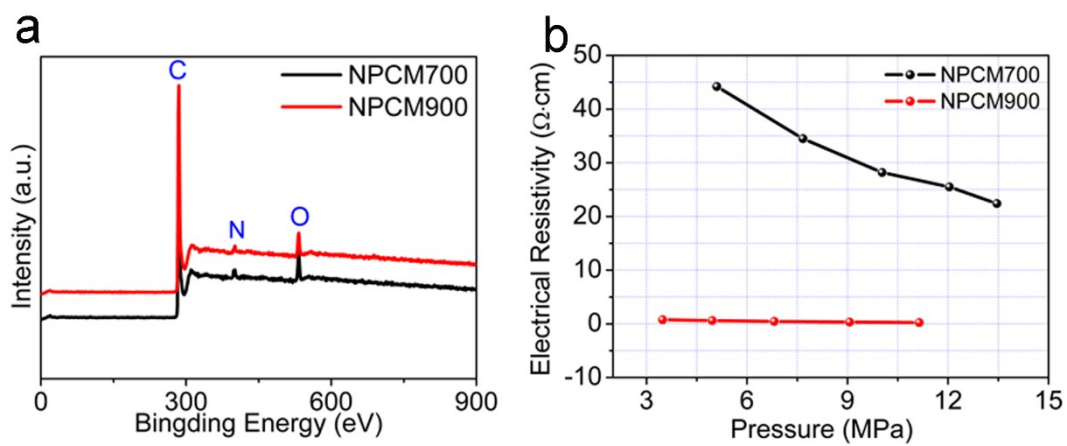

**Figure S2.** (a) XPS spectra and (b) The electrical resistivity of the NPCM700 and NPCM900.

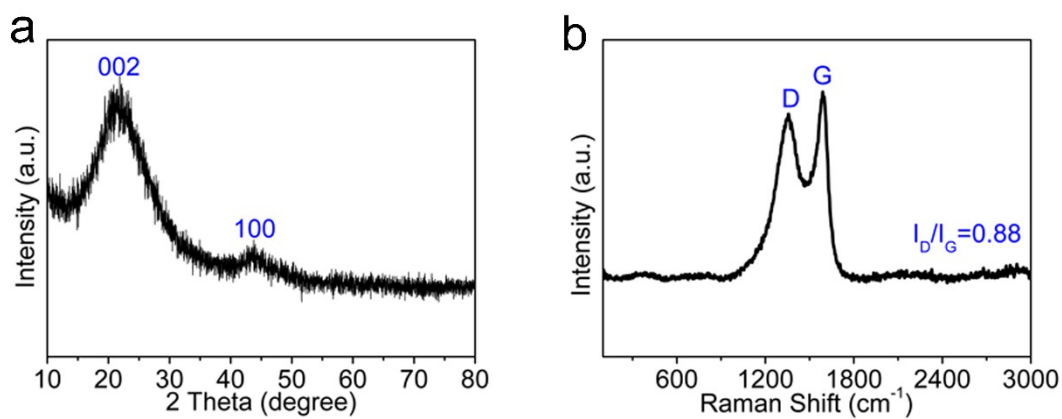

**Figure S3.** (a) XRD pattern (b) Raman spectrum of the NPCM-A.

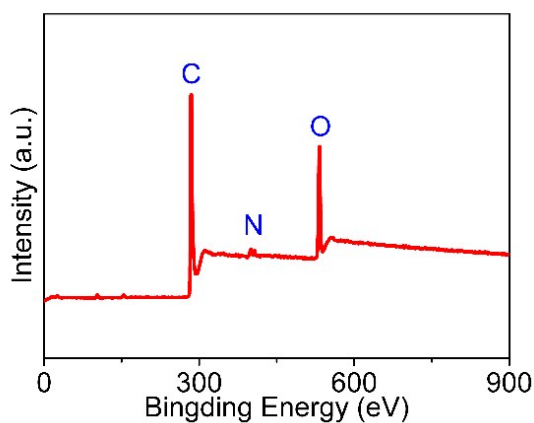

**Figure S4.** The XPS spectrum of the NPCM-A.

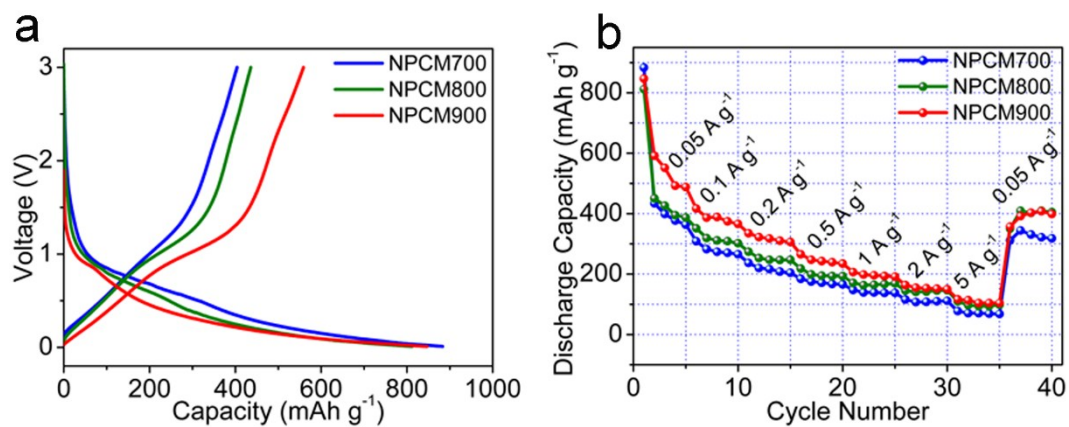

**Figure S5.** (a) The initial galvanostatic charge/discharge curves, (b) rate capability of NPCM700, NPCM800 and NPCM900 anode.

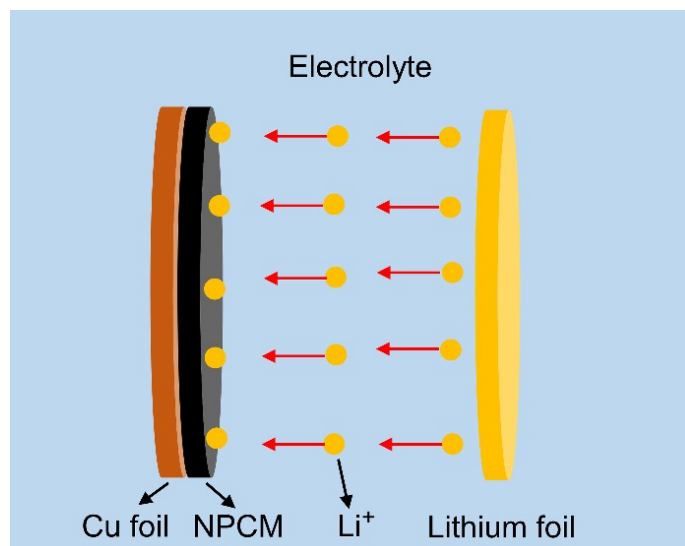

**Figure S6.** Schematic diagram of the pre-lithiation by an internal short method.

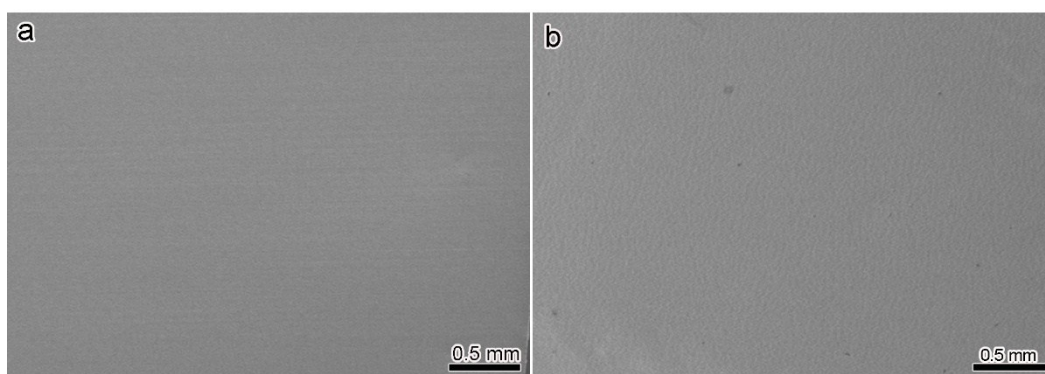

**Figure S7.** SEM images of conventional (a) Al foil and (b) Cu foil current collectors.

**Table S1.** Comparison of the electrochemical performance of PCC-LIC and CCC-LIC with other systems reported in the literature.

| LICs system                                            | Voltage range (V) | Energy density (Wh kg <sup>-1</sup> ) | Power density (kW kg <sup>-1</sup> ) | Cycles (Nos) | Capacity retention (%) | Reference |
|--------------------------------------------------------|-------------------|---------------------------------------|--------------------------------------|--------------|------------------------|-----------|
| PCC-LIC                                                | 2~4               | 95.08                                 | 15                                   | 3000/5000    | 87.7/80.1%             | This work |
| CCC-LIC                                                | 2~4               | 90.0                                  | 15                                   | 3000/5000    | 85.5/71.1%             | This work |
| Fe <sub>3</sub> O <sub>4</sub> //GO                    | 1~4               | 86.0                                  | 2.6                                  | 1000         | 70%                    | S1        |
| H <sub>2</sub> Ti <sub>6</sub> O <sub>13</sub> //CMK-3 | 1~3.5             | 90.0                                  | 11                                   | 1000         | 80%                    | S2        |
| Li <sub>4</sub> Ti <sub>5</sub> O <sub>12</sub> //AC   | 1~2.5             | 50.0                                  | 15                                   | 1000         | 75%                    | S3        |
| LiCrTiO <sub>4</sub> //AC                              | 1~3               | 23.4                                  | 4                                    | 1000         | 85.5                   | S4        |
| VN//APDC                                               | 0~4               | 64                                    | 10                                   | 1000         | 83.0                   | S5        |
| TiO <sub>2</sub> -B//AC                                | 0~2.8             | 23                                    | 2.8                                  | 1200         | 73%                    | S6        |
| TiNb <sub>2</sub> O <sub>7</sub> //AC                  | 0~3.0             | 43                                    | 3                                    | 3000         | 84%                    | S7        |
| TiNb <sub>2</sub> O <sub>7</sub> //GO                  | 0~3               | 74                                    | 7.5                                  | 3000         | 81.2%                  | S8        |
| H <sub>2</sub> Ti <sub>8</sub> O <sub>17</sub> //AC    | 0~3               | 93.8                                  | 15                                   | 3000         | 78.8%                  | S9        |
| MoS <sub>2</sub> //GO                                  | 0~4               | 97.0                                  | 8.3                                  | 2000         | 78%                    | S10       |
| Li <sub>4</sub> Ti <sub>5</sub> O <sub>12</sub> //PGM  | 1~3               | 40                                    | 8.3                                  | 1000         | 65%                    | S11       |
| Nb <sub>2</sub> O <sub>5</sub> //PSC                   | 0.5~3             | 43.9                                  | 8.75                                 | 1000         | 87.3%                  | S12       |

**Table S2.** The capacity retention of the CCC-LIC and PCC-LIC during different cycles.

| Sample/capacity retention | 1000 cycles (%) | 3000 cycles (%) | 5000 cycles (%) |
|---------------------------|-----------------|-----------------|-----------------|
| CCC-LIC                   | 97.4            | 85.5            | 71.1            |
| PCC-LIC                   | 99.3            | 87.7            | 80.1            |

## Supplementary references

- S1. F. Zhang, T. Zhang, X. Yang, L. Zhang, K. Leng, Y. Huang and Y. Chen, *Energy Environ. Sci.*, 2013, **6**, 1623-1632.
- S2. Y. Wang, Z. Hong, M. Wei and Y. Xia, *Adv. Funct. Mater.*, 2012, **22**, 5185-5193.
- S3. H. Kim, K. Y. Park, M. Y. Cho, M. H. Kim, J. Hong, S. K. Jung, K. C. Roh and K. Kang, *ChemElectroChem*, 2014, **1**, 125-130.
- S4. V. Aravindan, W. Chuilin and S. Madhavi, *J. Mater. Chem.*, 2012, **22**, 16026-16031.
- S5. R. Wang, J. Lang, P. Zhang, Z. Lin and X. Yan, *Adv. Funct. Mater.*, 2015, **25**, 2270-2278.
- S6. V. Aravindan, N. Shubha, W. C. Ling and S. Madhavi, *J. Mater. Chem. A*, 2013, **1**, 6145-6151.
- S7. V. Aravindan, J. Sundaramurthy, A. Jain, P. S. Kumar, W. C. Ling, S. Ramakrishna, M. P. Srinivasan and S. Madhavi, *ChemSusChem*, 2014, **7**, 1858-1863.
- S8. H. Li, L. Shen, J. Wang, S. Fang, Y. Zhang, H. Dou and X. Zhang, *J. Mater. Chem. A*, 2015, **3**, 16785-16790.
- S9. L. Que, Z. Wang, F. Yu and D. Gu, *J. Mater. Chem. A*, 2016, **4**, 8716-8723.
- S10. F. Zhang, Y. Tang, H. Liu, H. Ji, C. Jiang, J. Zhang, X. Zhang and C.S. Lee, *ACS Appl. Mater. Interfaces*, 2016, **8**, 4691-4699.
- S11. L. Ye, Q. Liang, Y. Lei, X. Yu, C. Han, W. Shen, Z.H. Huang, F. Kang and Q.H. Yang, *J. Power Sources*, 2015, **282**, 174-178.
- S12. J. Wang, H. Li, L. Shen, S. Dong and X. Zhang, *RSC Adv.*, 2016, **6**, 71338-71344.
